# Supplementary material
Source: publisher site journal article supplement (https://www.dovepress.com/article/298959)
Supplement: Supplementary file 1 [file get_supplementary_file.php]

**Supplement Table 1. ICD-9 and ICD-10 of Co-morbidity in this study**

| **Co-Morbidity** | **ICD-9** | **ICD-10** |
| --- | --- | --- |
| **CVA** | **433-434**  **436-437** | **I63**  **I69** |
| **HTN** | **401-405** | **I10** |
| **CAD** | **411**  **414** | **I25** |
| **CHF** | **428**  **402**  **404** | **I50** |
| **DM** | **250** | **E08-E13** |
| **ESRD** | **585-586** | **N18-N19** |
